# Supplementary material for: R3-AFP score is a new composite tool to refine prediction of hepatocellular carcinoma recurrence after liver transplantation
Source: PubMed Central journal article supplement — JHEP Rep. 2022 Feb 2;4(5):100445. doi: 10.1016/j.jhepr.2022.100445 (PMC8961219; doi:10.1016/j.jhepr.2022.100445), 2022-02-02
Supplement: mmc1.pdf [file mmc1.pdf]

# **R3-AFP score is a new composite tool to refine prediction of hepatocellular carcinoma recurrence after liver transplantation**

Charlotte Costentin, Federico Piñero, Helena Degroote, Andrea Notarpaolo, Ilka F. Boin, Karim Boudjema, Cinzia Baccaro, Luis G. Podestá, Philippe Bachellier, Giuseppe Maria Ettorre, Jaime Poniachik, Fabrice Muscari, Fabrizio Dibenedetto, Sergio Hoyos Duque, Ephrem Salame, Umberto Cillo, Sebastian Marciano, Claire Vanlemmens, Stefano Fagiuoli, Patrizia Burra, Hans Van Vlierberghe, Daniel Cherqui, Quirino Lai, Marcelo Silva, Fernando Rubinstein, and Christophe Duvoux for the French-Italian-Belgium and Latin American collaborative group for HCC and liver transplantation

## Table of contents

|                               |    |
|-------------------------------|----|
| Statistical analysis.....     | 2  |
| Fig. S1.....                  | 3  |
| Fig. S2.....                  | 3  |
| Fig. S3.....                  | 4  |
| Table S1.....                 | 5  |
| Table S2.....                 | 6  |
| Table S3.....                 | 7  |
| Table S4.....                 | 8  |
| Table S5.....                 | 9  |
| Table S6.....                 | 10 |
| Table S7.....                 | 11 |
| Table S8.....                 | 12 |
| Supplementary references..... | 13 |

### ***Statistical Analysis***

We conducted multivariable competing risk regression models for the primary outcome (HCC recurrence), estimating sub-distribution of hazard ratios (SHR) and 95% confidence intervals (95% CI) using the Fine and Gray method (1). Any cause of death prior to HCC recurrence was considered a competing event. In the TC, we assessed variables independently associated with HCC recurrence. Variables with a P value <0.05 after univariate analysis (Wald test) were included in the multivariable analysis by stepwise forward elimination considering confounding effect (>20% of change in crude HR) and following the “1 variable per 10 events” rule to avoid overfitting (1). For the construction of the final predictive score, points were assigned dividing each SHR with the lowest SHR observed from the final multivariable competing risk model. A stratification risk assessment was performed according to the observed incidence of 5-year HCC recurrence based on the cumulative scoring model in different stratum. To further validate the final model, all variables included in the final model in the TC were evaluated in the VC. SHR and their 95% CI in the VC were numerically compared to those in the TC. Additionally, the same stratification risk assessment in the TC was conducted in the VC.

Each model’s performance was explored, including calibration and discrimination. Calibration was assessed comparing observed and predicted risk curves and discrimination with Wolber’s adapted c-statistics (2). The new model was compared with prior explant models including tumor pathology features (Milan and the Up-to-7 criteria), and with the RETREAT score, a composite model including explant features and AFP values at last pre-transplant evaluation. Potential cut-offs for the final model were identified using the Akaike information criterion (AIC) and the Bayesian information criterion (BIC) for exploring the best model of fit. Finally, the net reclassification index (NRI) considering competing events was estimated comparing selected thresholds to evaluate the re-categorization of risk (3, 4).

### ***External validation of the Recurrence Risk Reassessment scores***

Multivariable competing risk regression analysis including the exposure variables in the R3 score was also tested in the validation cohort (Supplementary Table 6). In the model limited to explant features, nuclear grade adjusted for the other independent variables was not significantly associated with recurrence in the VC. However, the Wolber’s c-index for the R3 explant-based model was 0.73 (95%CI 0.67-0.79). When exploring the effect of last AFP value in the VC, nuclear grade was also not independently associated with recurrence, adjusted for tumor number and largest diameter, and AFP values (Supplementary Table 7). However, the R3-AFP model in the VC had a Wolber’s c-index of 0.78 (95%CI=0.73-0.83), which outperformed that from the original R3 score without AFP (P=0.018).

**Supplementary Figure 1: 5-year HCC cumulative recurrence according to R3 score integer value in the test cohort**

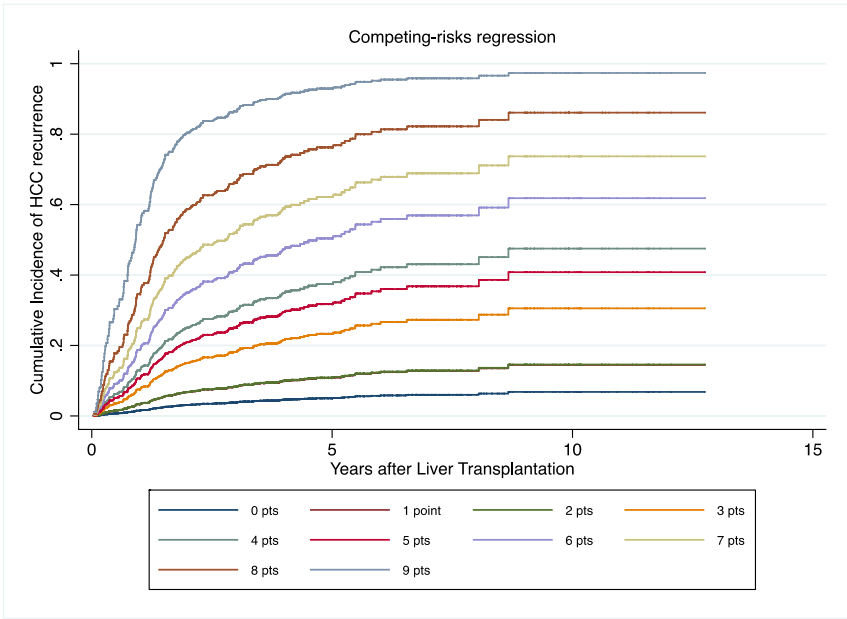

**Supplementary Figure 2: 5-year HCC cumulative recurrence according to R3-AFP score integer value in the test cohort**

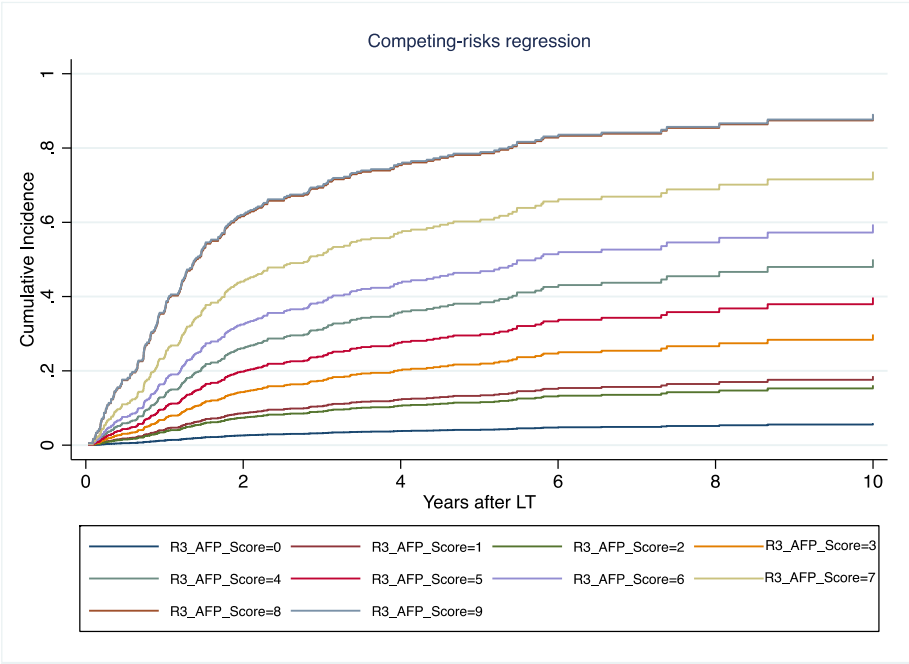

**Supplementary Figure 3: Expected vs. Observed cumulative incidence curves of events according to R3-AFP score categories**

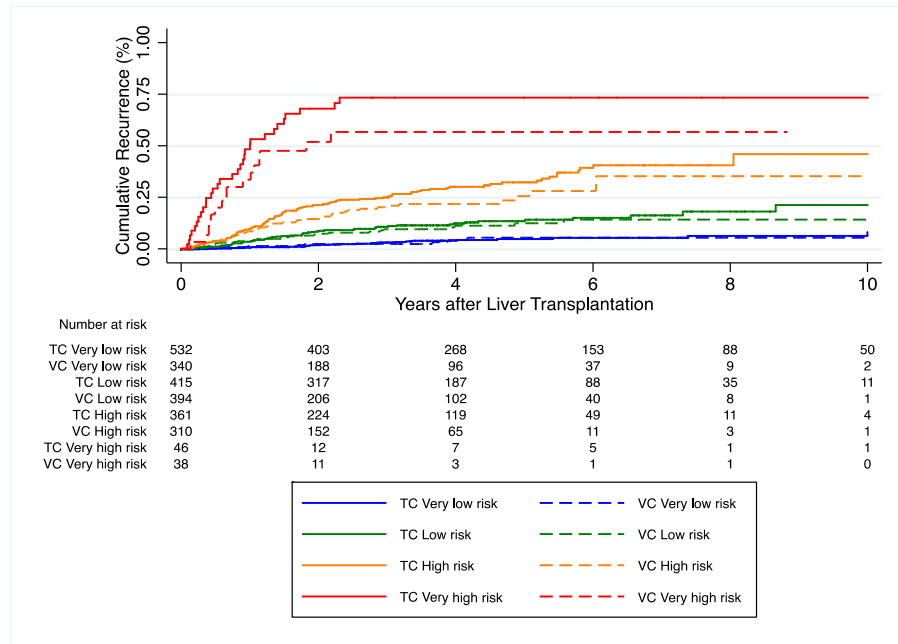

**Table S1: main features of the training and validation cohorts**

| <b>Variable Name</b>            | <b>Training cohort</b> | <b>Validation cohort</b> | <b><i>P</i></b> |
|---------------------------------|------------------------|--------------------------|-----------------|
| <b>Number of patients n</b>     | 1359                   | 1085                     |                 |
| <b>Number of LT centers n</b>   | 30                     | 17                       |                 |
| <b>Year, Period of LT n (%)</b> |                        |                          |                 |
| 2000-2005                       | 572 (42.1)             | 22 (2.0)                 | <0.000<br>1     |
| 2006-2011                       | 610 (44.9)             | 368 (33.9)               |                 |
| 2011-2018                       | 177 (13.0)             | 695 (64.1)               |                 |

**Note:** Patients in the TC were included in 20 centers from France (n=352), 4 from Italy (n=481) and 6 centers from Belgium (n=526). Seventeen LT centers participated in the Latin American VC, including 5 centers from Argentina (n=325), 3 centers from Brazil (n=376), 3 from Chile (n=90), 2 from Colombia (n=157), 2 from Mexico (n=63) and 1 center from Ecuador (n=13), Peru (n=26) and Uruguay (n=35).

**Table S2. Findings at explant pathology analysis.**

| <b>VARIABLE</b>                               | <b>Test cohort<br/>(n=1359)</b> | <b>Validation<br/>cohort<br/>(n=1085)</b> | <b>P</b> |
|-----------------------------------------------|---------------------------------|-------------------------------------------|----------|
| <b>Number of HCC nodules</b>                  |                                 |                                           |          |
| 1-3 nodules                                   | 1005 (73.9)                     | 911 (84.0)                                | <0.0001  |
| ≥4 nodules                                    | 354 (26.0)                      | 174 (16.0)                                |          |
| <b>Largest nodule diameter</b>                |                                 |                                           |          |
| ≤3 cm                                         | 849 (67.1)                      | 633 (59.2)                                | <0.0001  |
| 3-6 cm                                        | 361 (28.6)                      | 398 (37.3)                                |          |
| >6 cm                                         | 54 (4.3)                        | 38 (3.5)                                  |          |
| <b>Complete major nodule necrosis, n (%)</b>  | 94 (6.9)                        | 11 (1.0)                                  | <0.0001  |
| <b>Presence macrovascular invasion, n (%)</b> | 52 (3.8)                        | 0                                         | <0.0001  |
| <b>Presence microvascular invasion, n (%)</b> | 369 (27.1)                      | 249 (22.9)                                | 0.017    |
| <b>Tumor differentiation, n (%)</b>           |                                 |                                           |          |
| Nuclear grade I-II                            | 1003 (85.3)                     | 739 (71.2)                                | <0.0001  |
| Nuclear grade >II                             | 173 (14.7)                      | 299 (28.8)                                |          |
| <b>Within Milan, n (%)</b>                    | 847 (62.3)                      | 721 (66.4)                                | 0.034    |
| <b>Within Up-to 7 without mvi</b>             | 832 (61.2)                      | 737 (67.9)                                | 0.001    |
| <b>Within Up-to 7 with mvi</b>                | 212 (15.6)                      | 169 (15.6)                                |          |
| <b>Beyond Up-to 7 without mvi</b>             | 158 (11.6)                      | 99 (9.1)                                  |          |
| <b>Beyond Up-to 7 with mvi</b>                | 157 (11.5)                      | 80 (7.4)                                  |          |
| <b>RETREAT score, n (%)</b>                   |                                 |                                           |          |
| ≤3 points                                     | 981 (72.3) <sup>^</sup>         | 770 (71.6) <sup>^</sup>                   | 0.28     |
| >3 points                                     | 376 (27.7) <sup>^</sup>         | 306 (28.4) <sup>^</sup>                   |          |

**Note:** Test cohort (European cohort). Validation cohort (LATAM cohort). <sup>^</sup>At last pre-transplant evaluation. Each patient was classified according to Milan criteria (4) and the Up-to-7 criteria (5) based on explant pathology features, both as post-LT models for risk of recurrence, and the RETREAT score (11) based on last AFP values. Low and high risk of recurrence categories for each explant-based model were defined as within/beyond Milan, within Up-to-7 with or without microvascular invasion, and a RETREAT score equal or less than 3 points, as reported in the seminal publications.

**Table S3. Development of the R3 score (without AFP values). Points assigned from the multivariable competing risk regression analysis in the test cohort.**

| <b>VARIABLE</b>               | <b>Adjusted SHR<br/>(95% CI)</b> | <b>P</b> | <b>Points</b> |
|-------------------------------|----------------------------------|----------|---------------|
| <b>Number of nodules</b>      |                                  |          |               |
| 1-3 nodules (n=1005)          |                                  |          | 0             |
| ≥4 nodules (n=354)            | 1.81 (1.30-2.53)                 | <0.0001  | 1             |
| <b>Major nodule diameter</b>  |                                  |          |               |
| ≤3 cm (n=849)                 | -                                | -        | 0             |
| 3-6 cm (n=361)                | 1.91 (1.35-2.70)                 | <0.0001  | 2             |
| >6 cm (n=54)                  | 5.82 (3.60-9.39)                 | <0.0001  | 5             |
| <b>Microvascular invasion</b> |                                  |          |               |
| Absence (n=990)               |                                  |          | 0             |
| Presence (n=369)              | 2.70 (1.94-3.76)                 | <0.0001  | 2             |
| <b>Nuclear grade &gt;II</b>   |                                  |          |               |
| Absence (n=1003)              |                                  |          | 0             |
| Presence (n=173)              | 1.22 (1.02-1.46)                 | 0.02     | 1             |

**Note:** Scoring model was done dividing each SHR with the lowest SHR observed (total of 9 points).

Median 1 point (IQR 0-3); SHR 1.51 (CI 1.43-1.60).

**Table S4. Competing risk regression analysis evaluating AFP inclusion in exposure variables included in the original R3 score. Test cohort.**

| <b>VARIABLE</b>              | <b>5-year recurrence rate (95% CI)</b> | <b>Unadjusted Sub-Hazard Ratio (95% CI)</b> | <b>P</b>    | <b>Adjusted Sub-Hazard Ratio (95% CI)</b> | <b>P</b>    |
|------------------------------|----------------------------------------|---------------------------------------------|-------------|-------------------------------------------|-------------|
| <b>Number of nodules</b>     |                                        | 1.03 (1.01-1.04)                            | <0.000<br>1 |                                           |             |
| 1-3 nodules (n=1005)         | 14.2 (11.7-17.1)                       |                                             |             |                                           |             |
| ≥4 nodules (n=354)           | 35.7 (29.4-42.9)                       | 2.73 (2.07-3.59)                            | <0.000<br>1 | 1.88 (1.34-2.64)                          | <0.000<br>1 |
| <b>Major nodule diameter</b> |                                        | 1.37 (1.31-1.44)                            | <0.000<br>1 |                                           |             |
| ≤3 cm (n=849)                | 13.8 (11.1-17.1)                       | -                                           | -           | -                                         | -           |
| 3-6 cm (n=361)               | 30.4 (24.5-37.7)                       | 2.32 (1.72-3.14)                            | <0.000<br>1 | 1.83 (1.29-2.59)                          | 0.001       |
| >6 cm (n=54)                 | 74.5 (58.7-87.9)                       | 9.21 (5.98-14.17)                           | <0.000<br>1 | 5.82 (2.97-8.20)                          | <0.000<br>1 |
| <b>Microvasc invasion</b>    | 11.4 (9.2-14.0)                        |                                             |             |                                           |             |
| Absence (n=369)              | 39.6 (32.9-46.3)                       | 4.04 (3.06-5.32)                            | <0.000<br>1 | 2.69 (1.93-3.75)                          | <0.000<br>1 |
| <b>Nuclear grade &gt;II</b>  | 15.9 (13.3-19.0)                       |                                             |             |                                           |             |
| Absence (n=1003)             | 28.2 (21.2-36.9)                       | 1.47 (1.23-1.74)                            | <0.000<br>1 | 1.20 (1.01-1.43)                          | 0.048       |
| <b>AFP (ng/ml)*</b>          | 16.9 (14.4-19.9)                       | -                                           | -           | -                                         | -           |
| ≤100 (n=1191)                | 36.9 (27.8-47.8)                       | 2.49 (1.74-3.54)                            | <0.000<br>1 | 1.57 (1.03-2.39)                          | -<br>0.035  |
| >1000 (n=27)                 | 45.9 (29.2-66.6)                       | 4.64 (2.37-9.01)                            | <0.000<br>1 | 2.83 (1.01-7.96)                          | 0.049       |

**Abbreviations: AFP:** alpha-fetoprotein. HCC: Hepatocellular carcinoma. \*Last available AFP values prior to LT (Median time from last AFP values to transplantation was 2.2 months (IQR 0.9-4.0 months). Calibration between observed/predictive was adequate and c-statistic (Wolber's c-index) was **0.76 (CI 0.72-0.80)**



**Table S5. Explant pathology liver findings associated with HCC recurrence after liver transplantation in the validation cohort. Competing risk regression analysis.**

| <b>VARIABLE</b>               | <b>5-year recurrence rate (95% CI)</b> | <b>Unadjusted Sub-Hazard Ratio (95% CI)</b> | <b>P</b>    | <b>Adjusted Sub-Hazard Ratio (95% CI)</b> | <b>P</b>    |
|-------------------------------|----------------------------------------|---------------------------------------------|-------------|-------------------------------------------|-------------|
| <b>Number of nodules</b>      |                                        | 1.10 (1.06-1.13)                            | <0.000<br>1 |                                           |             |
| <b>1-3 nodules (n=911)</b>    | 14.5 (11.1-18.8)                       |                                             |             |                                           |             |
| <b>≥4 nodules (n=174)</b>     | 29.8 (21.5-40.3)                       | 2.72 (1.81-4.08)                            | <0.000<br>1 | 2.03 (1.32-3.12)                          | 0.001       |
| <b>Major nodule diameter</b>  |                                        | 1.38 (1.24-1.54)                            | <0.000<br>1 |                                           |             |
| <b>≤3 cm (n=633)</b>          | 11.2 (8.0-15.6)                        | -                                           | -           | -                                         | -           |
| <b>3-6 cm (n=398)</b>         | 21.6 (15.5-29.7)                       | 1.90 (1.25-2.89)                            | 0.003       | 1.57 (1.02-2.41)                          | 0.037       |
| <b>&gt;6 cm (n=38)</b>        | 61.2 (42.0-80.6)                       | 8.61 (4.82-15.39)                           | <0.000<br>1 | 5.27 (2.85-9.77)                          | <0.000<br>1 |
| <b>Microvascular invasion</b> | 11.0 (8.0-14.9)                        |                                             |             |                                           |             |
| Absence (n=825)               | 37.4 (27.7-49.2)                       | 4.07 (2.78-5.95)                            | <0.000<br>1 | 3.26 (2.07-5.12)                          | <0.000<br>1 |
| <b>Nuclear grade &gt;II</b>   | 8.4 (6.5-10.6)                         |                                             |             |                                           |             |
| Absence (n=739)               | 12.0 (8.6-16.3)                        | 1.26 (1.03-1.54)                            | 0.02        | 0.96 (0.76-1.21)                          | 0.71        |

**Abbreviations:** HCC: Hepatocellular carcinoma. C-statistic (Wolber's index) was 0.73 (CI 0.67-0.79).

Nuclear grade was included in the final model to adjust the effect or explore confounding effect in regard

**Table S6. Competing risk regression analysis evaluating AFP at last pre-LT assessment and exposure variables in the R3 score. Validation cohort.**

| <b>VARIABLE</b>               | <b>5-year recurrence rate (95% CI)</b> | <b>Unadjusted Sub-Hazard Ratio (95% CI)</b> | <b>P</b>    | <b>Adjusted Sub-Hazard Ratio (95% CI)</b> | <b>P</b>    |
|-------------------------------|----------------------------------------|---------------------------------------------|-------------|-------------------------------------------|-------------|
| <b>Number of nodules</b>      |                                        | 1.10 (1.06-1.13)                            | <0.000<br>1 |                                           |             |
| <b>1-3 nodules (n=911)</b>    | 14.5 (11.1-18.8)                       |                                             |             |                                           |             |
| <b>≥4 nodules (n=174)</b>     | 29.8 (21.5-40.3)                       | 2.72 (1.81-4.08)                            | <0.000<br>1 | 1.89 (1.19-3.01)                          | 0.007       |
| <b>Complete necrosis</b>      |                                        |                                             |             |                                           |             |
| Yes (n=11)                    | 0                                      | -**                                         | -           |                                           |             |
| No (n=1074)                   | 17.1 (13.8-21.0)                       |                                             |             |                                           |             |
| <b>Major nodule diameter</b>  |                                        | 1.38 (1.24-1.54)                            | <0.000<br>1 |                                           |             |
|                               | 11.2 (8.0-15.6)                        | -                                           | -           | -                                         | -           |
| <b>≤3 cm (n=633)</b>          | 21.6 (15.5-29.7)                       | 1.90 (1.25-2.89)                            | 0.003       | 1.45 (0.93-2.26)                          | 0.10        |
| <b>3-6 cm (n=398)</b>         |                                        |                                             | <0.000      |                                           | <0.000      |
| <b>&gt;6 cm (n=38)</b>        | 61.2 (42.0-80.6)                       | 8.61 (4.82-15.39)                           | 1           | 5.19 (2.73-9.83)                          | 1           |
| <b>Total tumor diameter</b>   |                                        | 1.12 (1.08-1.16)                            | <0.000<br>1 |                                           |             |
| <b>Microvascular invasion</b> | 11.0 (8.0-14.9)                        |                                             |             |                                           |             |
| Absence (n=825)               |                                        | 4.07 (2.78-5.95)                            | <0.000<br>1 | 2.66 (1.66-4.25)                          | <0.000<br>1 |
| Presence (n=249)              | 37.4 (27.7-49.2)                       |                                             |             |                                           |             |
| <b>Nuclear grade &gt;II</b>   | 8.4 (6.5-10.6)                         |                                             |             |                                           |             |
| Absence (n=739)               |                                        | 1.26 (1.03-1.54)                            | 0.02        | 0.93 (0.73-1.18)                          | 0.55        |
| Presence (n=299)              | 12.0 (8.6-16.3)                        |                                             |             |                                           |             |
| <b>AFP (ng/ml)*</b>           | 12.7 (9.5-17.1)                        |                                             |             |                                           |             |
| ≤100 (n=893)                  |                                        | -                                           | -           | -                                         | -           |
| 101-1000 (n=147)              | 29.1 (20.2-40.7)                       | 3.0 (1.93-4.66)                             | <0.000<br>1 | 2.33 (1.43-3.79)                          | <0.001      |
| >1000 (n=39)                  | 49.3 (32.0-69.7)                       | 6.40 (3.46-11.84)                           | <0.000<br>1 | 4.53 (2.36-8.73)                          | <0.000<br>1 |

**Abbreviations:** HCC: Hepatocellular carcinoma. Wolber's c-index was **0.78 (CI 0.73-0.83)**.

\* Last available AFP values prior to LT (Median time from last AFP values to transplantation in the VC was 2.3 months (IQR 0.9-5.3 months)). \*\***Inviably to be included in a mathematical modelling due to absence of events.**

**Table S7. Comparison regarding discrimination power of explant-based models in the test and validation cohorts.**

| <b>VARIABLE</b>                                                     | <b><i>Wolber's c-index (95% CI)</i></b> | <b><i>P values</i></b> |        |
|---------------------------------------------------------------------|-----------------------------------------|------------------------|--------|
| <b><i>a-Test cohort</i></b>                                         |                                         |                        |        |
| <b><i>Comparison against explant models (not including AFP)</i></b> |                                         |                        |        |
| <b>Milan criteria</b>                                               | 0.66 (0.62-0.69)                        | Ref                    |        |
| <b>Up-to 7 criteria without MVI</b>                                 | 0.70 (0.67-0.73)                        | 0.005                  | Ref    |
| <b>R3 score (without AFP)</b>                                       | 0.75 (0.72-0.79)                        | <.0001                 | <.0001 |
| <b><i>b-Validation cohort</i></b>                                   |                                         |                        |        |
| <b><i>Comparison against explant models (not including AFP)</i></b> |                                         |                        |        |
| <b>Milan criteria</b>                                               | 0.66 (0.61-0.71)                        | Ref                    |        |
| <b>Up-to 7 criteria without MVI</b>                                 | 0.68 (0.63-0.73)                        | 0.56                   | Ref    |
| <b>R3 score (without AFP)</b>                                       | 0.73 (0.67-0.79)                        | 0.002                  | <.0001 |

**Table S8: Locoregional treatment before LT. Comparison between cohorts.**

| <b>VARIABLE</b>                                   | <b>Test cohort<br/>(n=1359)</b> | <b>Validation cohort<br/>(n=1085)</b> | <b>P</b> |
|---------------------------------------------------|---------------------------------|---------------------------------------|----------|
| <b>Any treatment, n (%)</b>                       | 931 (68.5)                      | 782 (72.1)                            | 0.055    |
| <b>Type of locoregional treatment, n/patients</b> |                                 |                                       |          |
| receiving any treatment (%)                       | 710/931 (76.3)                  | 759/782 (97.1)                        | <.0001   |
| <b>TACE</b>                                       | 322/931 (34.6)                  | 29/782 (3.7)                          | <.0001   |
| <b>RFA</b>                                        | 119/931 (12.8)                  | 4/782 (0.5)                           | <.0001   |
| <b>PEI</b>                                        | 103/931 (11.1)                  | 4/782 (0.5)                           | <.0001   |
| <b>LR</b>                                         |                                 |                                       |          |
| <b>Locoregional treatment, n/whole cohort (%)</b> |                                 |                                       |          |
| <b>Within Milan at listing</b>                    | 710/1039 (68.3)                 | 660/939 (70.3)                        | 0.35     |
| <b>Beyond Milan at listing</b>                    | 221/320 (69.1)                  | 122/146 (83.6)                        | 0.001    |
| <b>Locoregional treatment, n/whole cohort (%)</b> |                                 |                                       |          |
| <b>AFP score ≤2 points at listing</b>             | 841/1221 (68.9)                 | 668/942 (70.9)                        | 0.31     |
| <b>AFP score &gt;2 points at listing</b>          | 90/137 (65.7)                   | 111/139 (79.9)                        | 0.008    |
| <b>Locoregional treatment, n/whole cohort (%)</b> |                                 |                                       |          |
| <b>AFP ≤100 ng/ml</b>                             | 823/1212 (67.9)                 | 631/877 (71.9)                        | 0.53     |
| <b>AFP 101-1000 ng/ml</b>                         | 96/129 (74.4)                   | 117/165 (70.9)                        |          |
| <b>AFP &gt;1000 ng/ml</b>                         | 12/18 (66.7)                    | 31/39 (79.5)                          |          |

**Abbreviations:** TACE: transarterial chemoembolization; RFA: radiofrequency ablation; PEI: percutaneous ethanol ablation; LR: liver resection. Test cohort (European cohort). Validation cohort (LATAM cohort).

## References

1. Dignam JJ, Zhang Q, Kocherginsky M. The use and interpretation of competing risks regression models. *Clin Cancer Res.* 2012;18(8):2301-8.
2. Wolbers M, Blanche P, Koller MT, Witteman JC, Gerds TA. Concordance for prognostic models with competing risks. *Biostatistics.* 2014;15(3):526-39.
3. Kerr KF, Wang Z, Janes H, McClelland RL, Psaty BM, Pepe MS. Net reclassification indices for evaluating risk prediction instruments: a critical review. *Epidemiology.* 2014;25(1):114-21.
4. Pencina MJ, D'Agostino RB, Sr., Steyerberg EW. Extensions of net reclassification improvement calculations to measure usefulness of new biomarkers. *Stat Med.* 2011;30(1):11-2
